# Supplementary material
Source: publisher figshare collection journal article supplement (https://acs.figshare.com/ndownloader/files/37575380)
Supplement: Supplementary file 1 [file 37575380]

# Supporting Information

## **Direct Thermochemical CO<sub>2</sub> Reduction to Reduced Graphene Oxide-like Nanomaterial: Implications for Environmental and Energy Storage and Conversion Applications**

*Ahmed Badreldin<sup>1</sup>, Khaled Elsaid<sup>1</sup>, Yiming Wubulikasimu<sup>1</sup>, Karim Youssef<sup>2</sup>, Zafar Khan Ghouri<sup>1, 3</sup>, Abdellatif El Ghenymy<sup>1</sup>, Dharmesh Kumar<sup>2</sup>, Ahmed Abdala<sup>1</sup>, and Ahmed Abdel-Wahab<sup>1\*</sup>*

<sup>1</sup>Chemical Engineering Program, Texas A&M University at Qatar, P.O. 23874, Doha, Qatar

<sup>2</sup>Qatar Shell Research and Technology Centre, P.O. Box 3747, Doha, Qatar

<sup>3</sup>International Center for Chemical and Biological Sciences, HEJ Research Institute of Chemistry, University of Karachi, Karachi 75270, Pakistan

\* Corresponding Author: Ahmed Abdel-Wahab, e-mail: [ahmed.wahab@qatar.tamu.edu](mailto:ahmed.wahab@qatar.tamu.edu)

**Table S1.** Summary table of synthesis parameters for prepared CO<sub>2</sub>-derived GO samples.

| Sample ID. | Substrate Type | CO <sub>2</sub> flow rate (mL/min) | Water content g <sub>H2O</sub> /g <sub>CO2</sub> | Rxn time (hrs) |
|------------|----------------|------------------------------------|--------------------------------------------------|----------------|
| S.N.1      | Foam           | 30                                 | 0                                                | 1              |
| S.N.2      |                |                                    |                                                  | 6              |
| S.N.3      |                |                                    |                                                  | 12             |
| S.N.4      |                |                                    | 0.14                                             | 3              |
| S.N.5      |                |                                    |                                                  | 12             |
| S.N.6      | Foil           |                                    |                                                  | 1              |
| S.N.7      |                |                                    |                                                  | 6              |

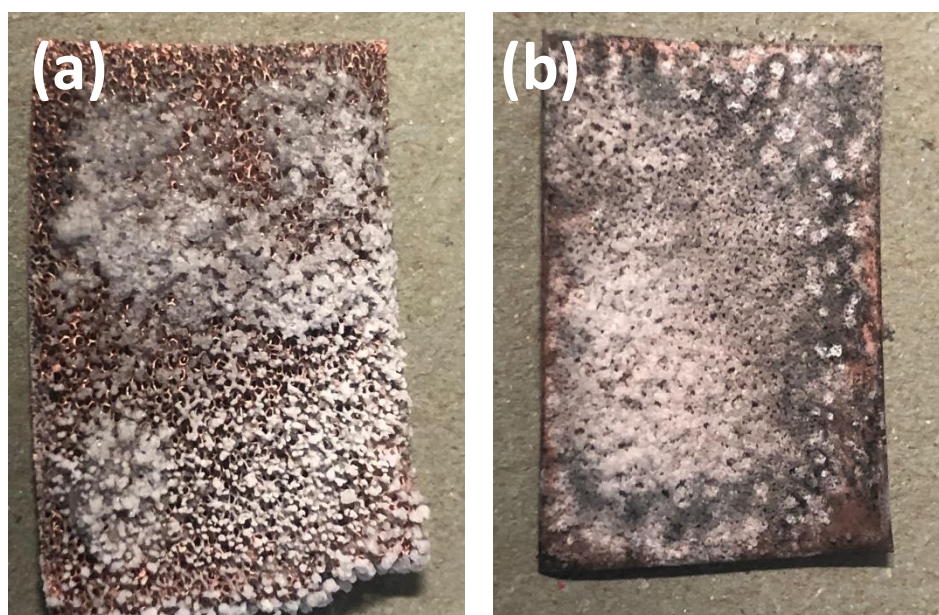**Figure S1.** (a) Digital images of copper foam and (b) foil after NaBH<sub>4</sub> deposition

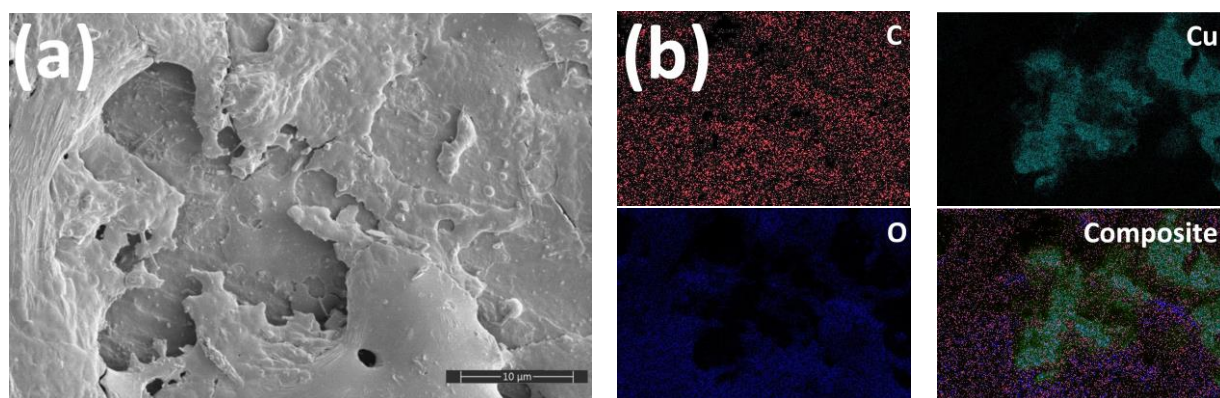

**Figure S2.** (a) FESEM and (b) corresponding FESEM/EDS elemental mapping for the S.N.6 sample before HCl washing.

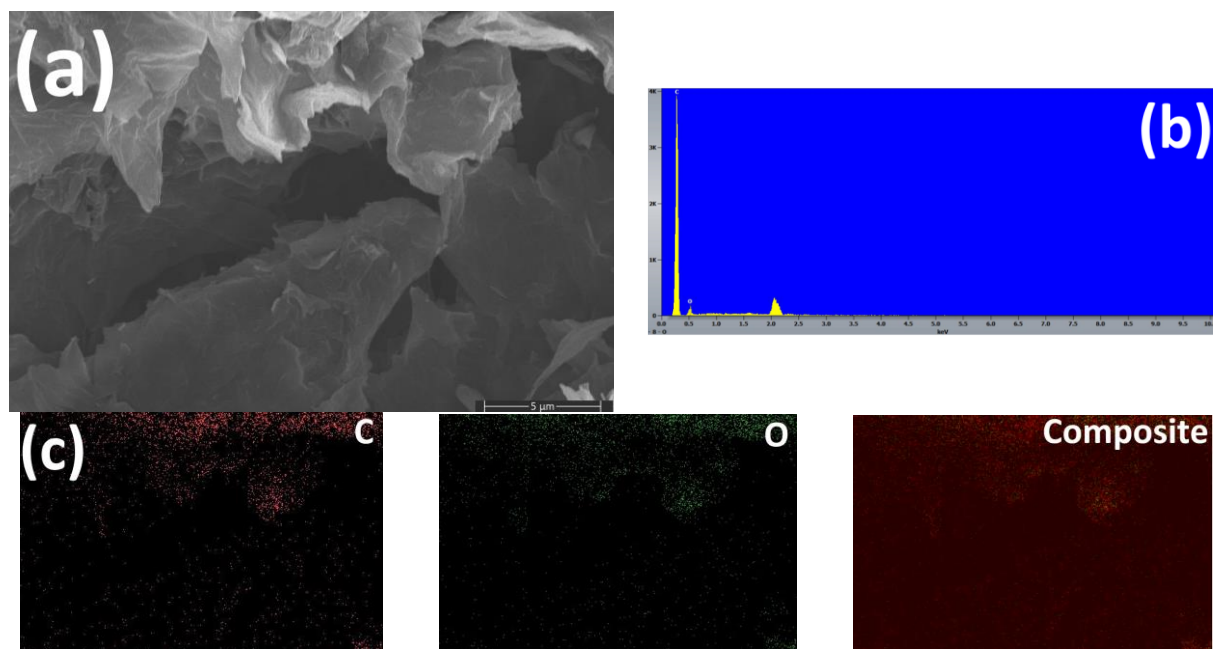

**Figure S3.** (a) FESEM, (b) EDS spectra, and (c) corresponding FESEM/EDS elemental mapping for the S.N.1 sample after HCl washing.

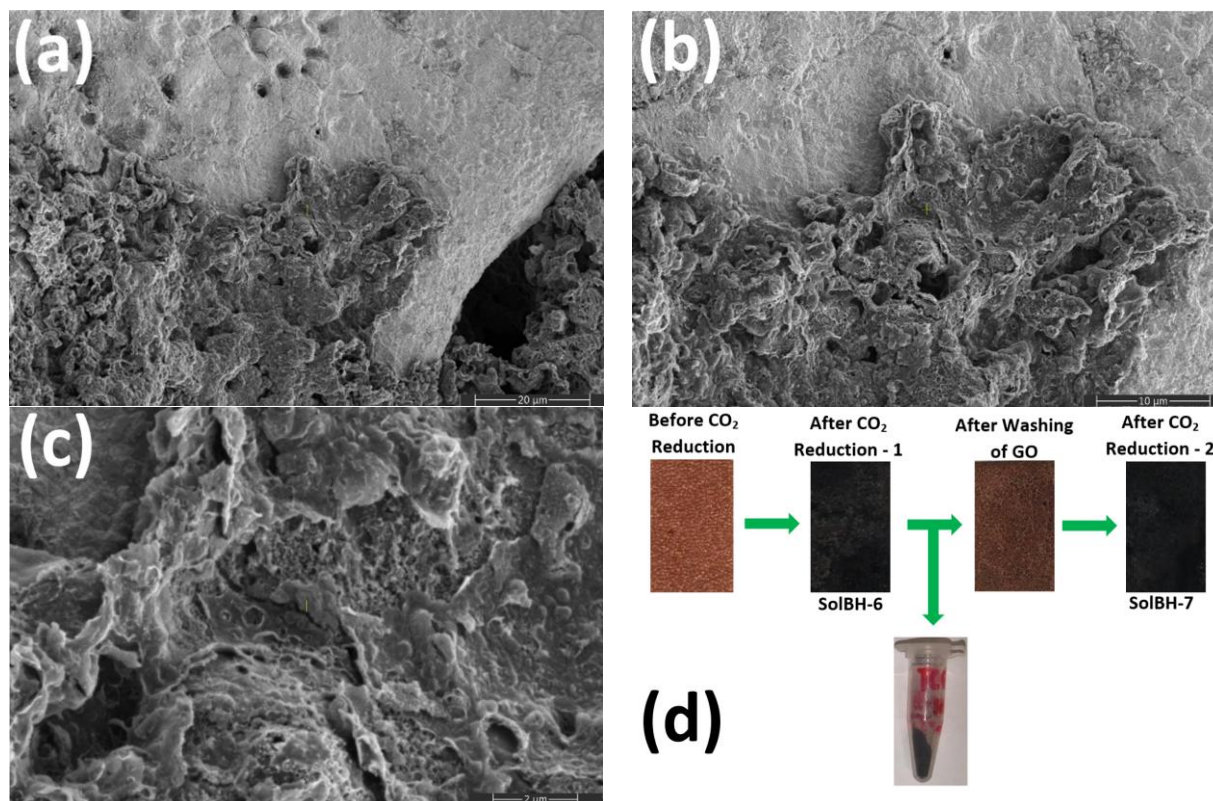

**Figure S4.** (a-c) Different magnification FESEM after  $\text{CO}_2$  reduction and HCl washing on surface of foam which produced the S.N.1 sample. (d) Schematic with digital images showing the foam surface from before  $\text{CO}_2$  reduction to after reduction, recycling, and reuse from S.N.1 to S.N.3.



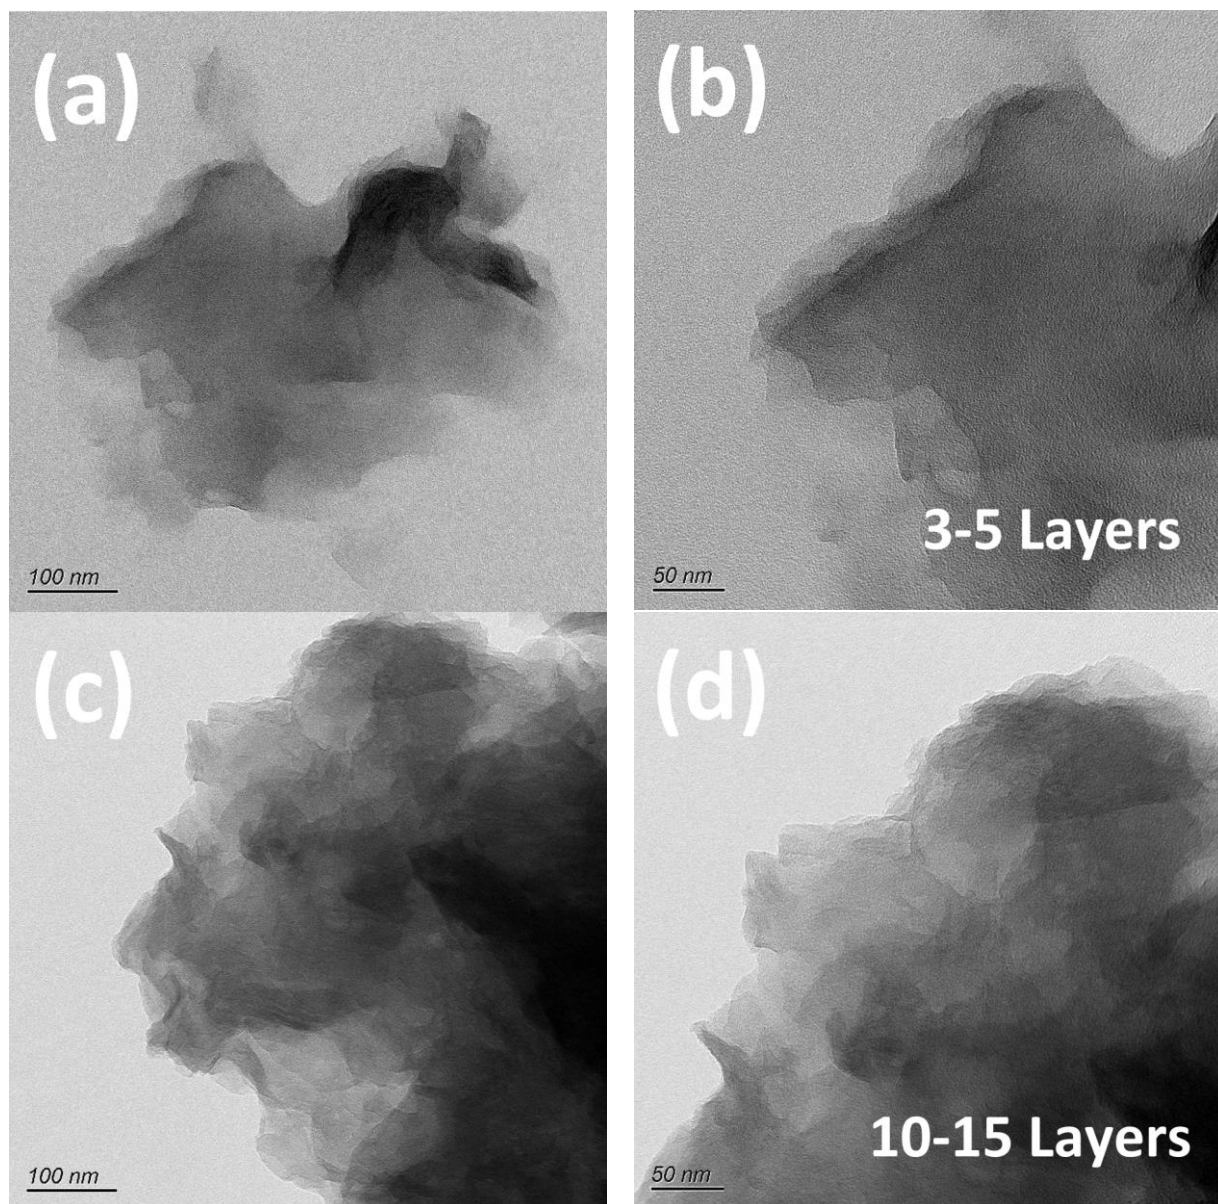

**Figure S5.** (a, b) Different magnification HRTEM images of S.N.6 sample showing regions with 3-5 layers rGO and (c, d) regions with 10-15 layers rGO.
